# Supplementary material
Source: Springer Nature journal article supplement (https://www.springermedizin.de/resource/supplementary/12889_2013_6520_MOESM5_ESM.pdf/9498350)

Population Size

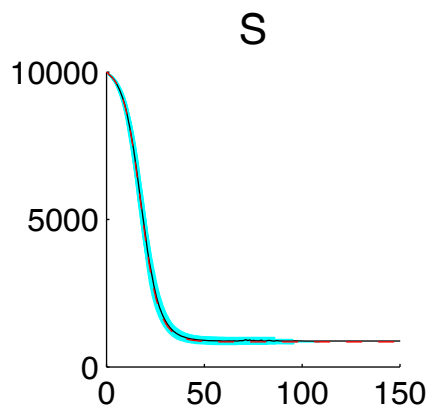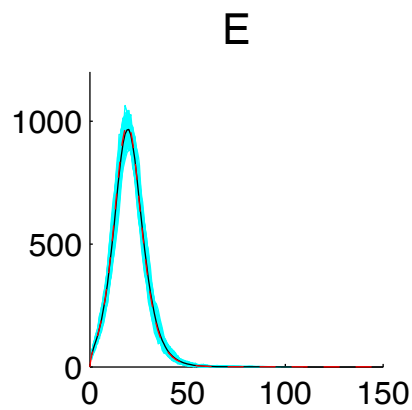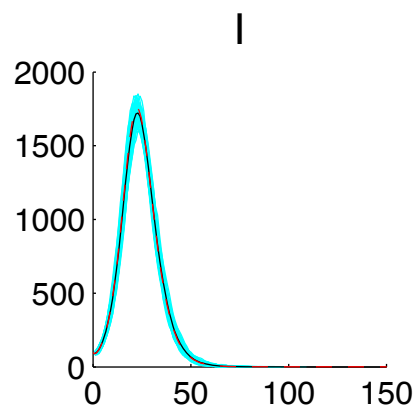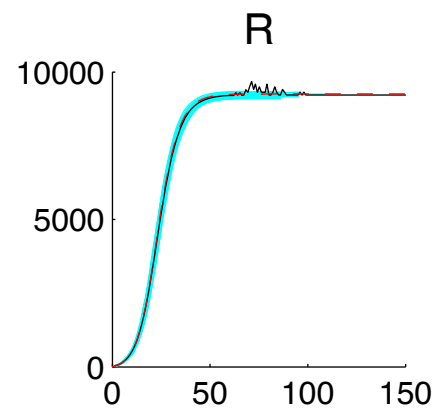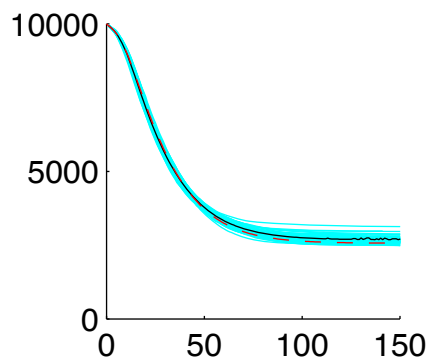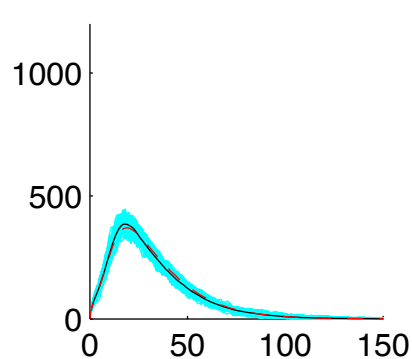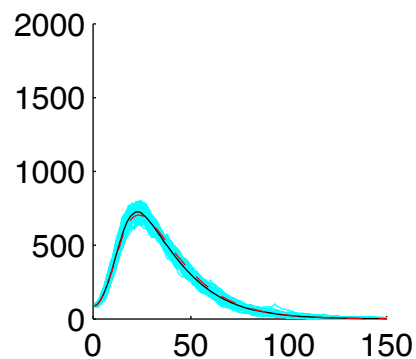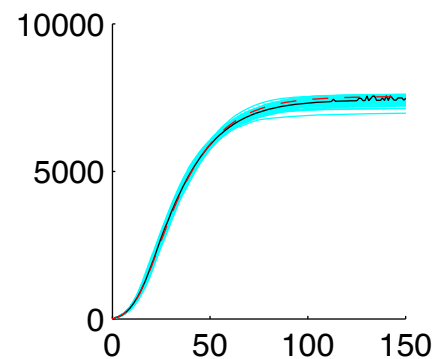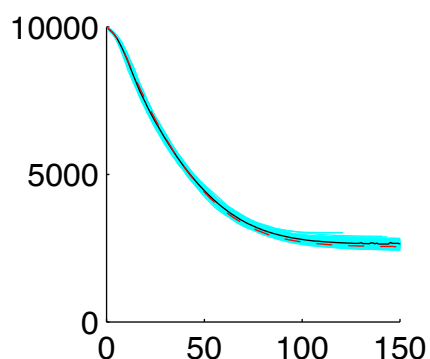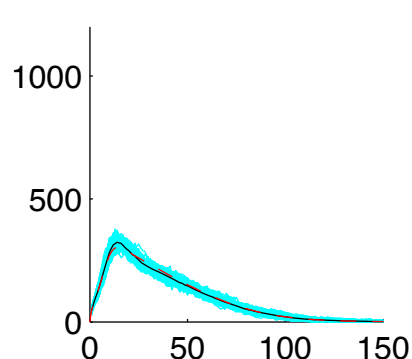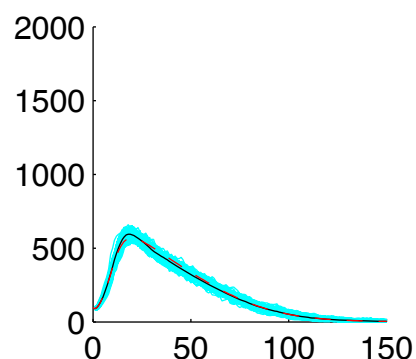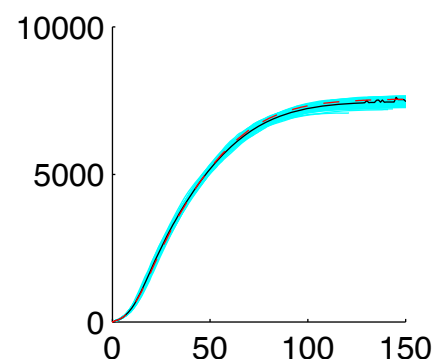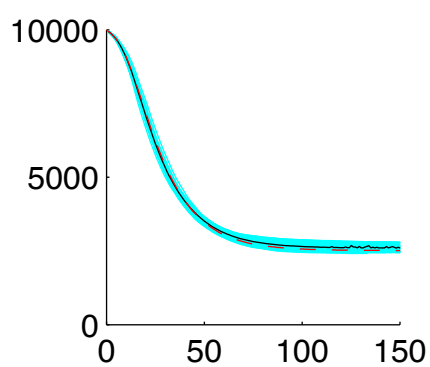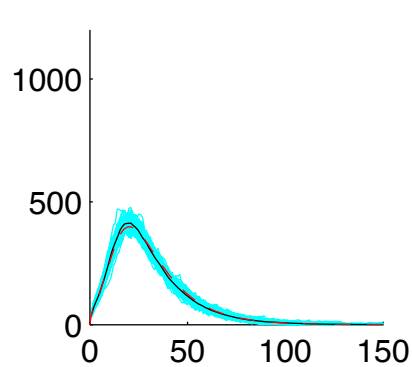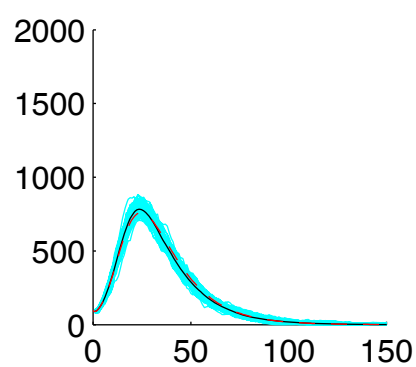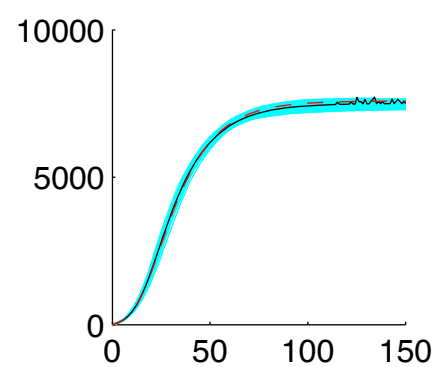

Supplement: MOESM5 [file 9498350]
